# Supplementary material for: Asymmetric Pseudocapacitors Based on Interfacial Engineering of Vanadium Nitride Hybrids
Source: PubMed Central journal article supplement (PMC7353334; doi:10.3390/nano10061141), 2020-06-10
Supplement: nanomaterials-10-01141-s001.pdf [file nanomaterials-10-01141-s001.pdf]

# Supporting Information

## Asymmetric Pseudocapacitors Based on Interfacial Engineering of Vanadium Nitride Hybrids

Hailan Su <sup>1</sup>, Tuzhi Xiong <sup>1</sup>, Qirong Tan <sup>1</sup>, Fang Yang <sup>1</sup>, Paul B. S. Appadurai <sup>1</sup>,  
Afeez A. Afuwape <sup>2</sup>, M.-Sadeeq (Jie Tang) Balogun <sup>1,\*</sup> Yongchao Huang<sup>3</sup>, and Kunkun Guo <sup>1,\*</sup>

<sup>1</sup> College of Materials Science and Engineering, Hunan University, Changsha 410082, Hunan, China;  
suehai@hnu.edu.cn (H.S.); xiongtz@hnu.edu.cn (T.X.); tqr@hnu.edu.cn (Q.T.); yfang@hnu.edu.cn (F.Y.);  
Paul.blessington123@gmail.com (P.B.S.A.)

<sup>2</sup> College of Computer Science and Electronic Engineering, Hunan University, Changsha 410082, Hunan,  
China; [afuwape07@hnu.edu.cn](mailto:afuwape07@hnu.edu.cn)

<sup>3</sup> Institute of Environmental Research at Greater Bay, Key Laboratory for Water Quality and Conservation of  
the Pearl River Delta, Ministry of Education, Guangzhou University, Guangzhou, 510006, China;  
[huangych@gzhu.edu.cn](mailto:huangych@gzhu.edu.cn)

\* Correspondence: [balogun@hnu.edu.cn](mailto:balogun@hnu.edu.cn) (M.-S. (J.T.) B.); [kunkunguo@hnu.edu.cn](mailto:kunkunguo@hnu.edu.cn) (K.G.)

## Experimental Section Cont.

**Synthesis of TiN/MnO<sub>2</sub> on CFC.** Firstly, TiO<sub>2</sub> nanowires were grown on carbon cloth by a seed-assisted hydrothermal method. The carbon cloth (5.0×3.0 cm) was cleaned with ethanol and then dried at 60 °C. Then, the carbon cloth was immersed into a mixture of 0.43 mL TiCl<sub>4</sub> and 20 mL distilled water. After 2 min, the carbon cloth was blow-dried and heated on a hot-plate in the air at 300 °C, repeat this step three times, resulting in TiO<sub>2</sub> nanoparticles on the carbon cloth surface. 0.6 mL of titanium n-butoxide was added into a mixed solution of 20 mL concentrated hydrochloric acid (37 %) and 20 mL distilled water, and then stirred into a transparent solution. The obtained solution together with the above-mentioned carbon cloth was transferred into a 50 mL Teflon-lined stainless steel autoclave, and heated in an electric oven at 160 °C for 5 hours. After naturally cooled down to room temperature, the carbon cloth was thoroughly washed with DI water and dried. Subsequently, TiO<sub>2</sub> nanorods were converted to TiN nanorods through thermal treatment at 800 °C in NH<sub>3</sub> (200 cc min<sup>-1</sup>) for 1 h. MnO<sub>2</sub> was grown on a TiN substrate via electrodeposition method as following: the carbon cloth with TiN NWs (2.0 ×0.5 cm) was conducted in a three-electrode cell with carbon cloth with TiN NWs as working electrode, Pt wire, and Ag/AgCl as counter electrode and reference electrode, respectively. The electrodeposition was carried out in a mixed solution of 0.1 M Mn(Ac)<sub>2</sub> and 0.1 M Na<sub>2</sub>SO<sub>4</sub> with 1.0 V constant potential for 90 s.

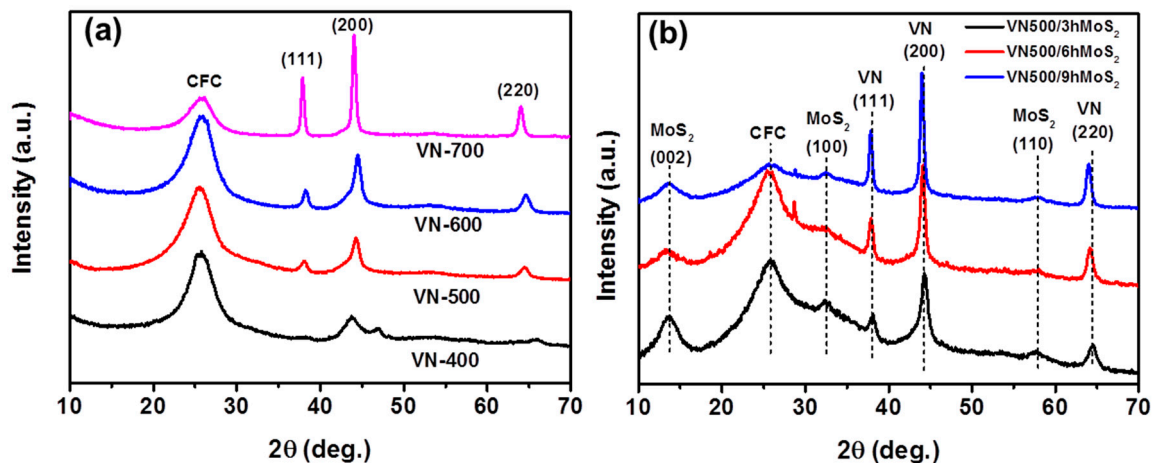

**Figure S1.** (a) XRD spectra of VO<sub>x</sub> samples annealed at different temperatures ranging from 400-700 °C. (b). XRD spectra of MoS<sub>2</sub> hydrothermally grown on VN-500 at different hydrothermal duration of 3 h, 6 h and 9 h. Upon the increase in the hydrothermal period of MoS<sub>2</sub>, the intensity of VN peaks gradually reduces, while those peaks intensity corresponding to hexagonal molybdenite-2H MoS<sub>2</sub> (JCPDS-#37-1492) increases accordingly (Figure S1b).

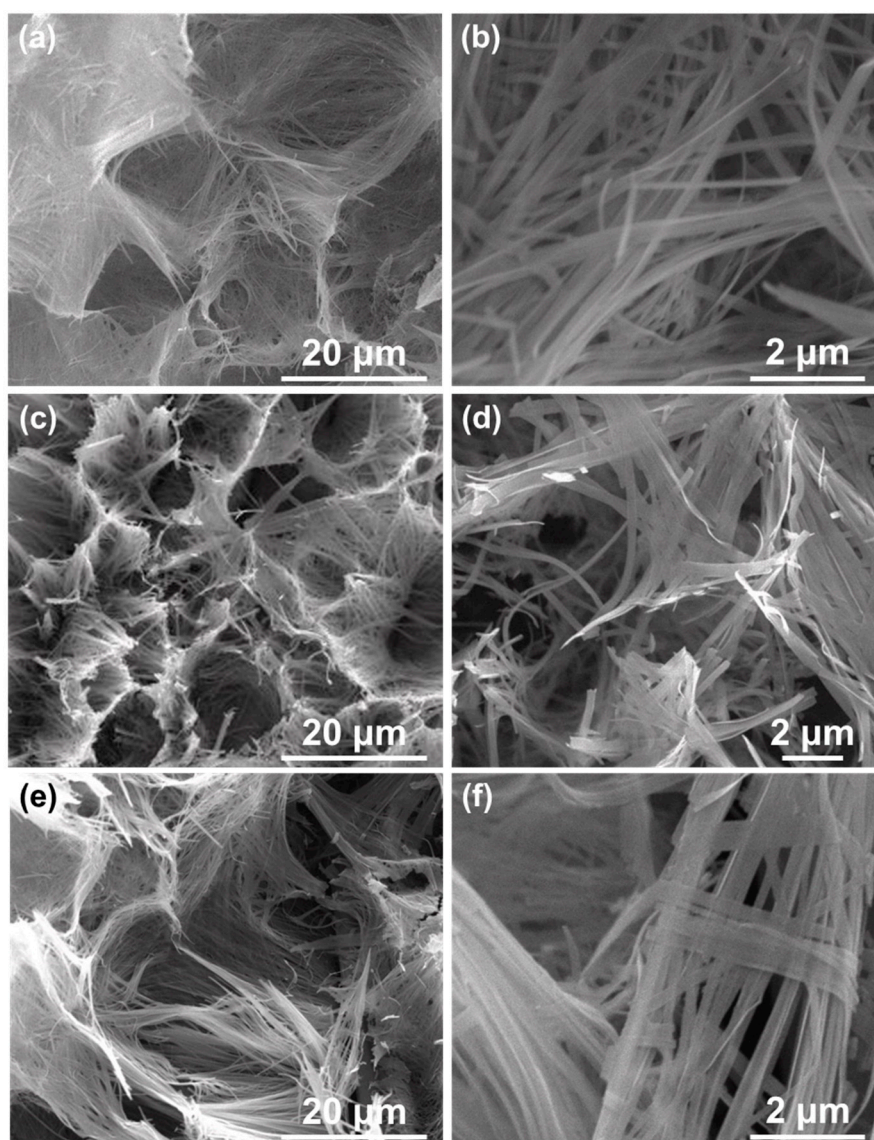

Figure S2. SEM images of (a, b) VM-500, (c, d) VN-600 and (e, f) VN-700.

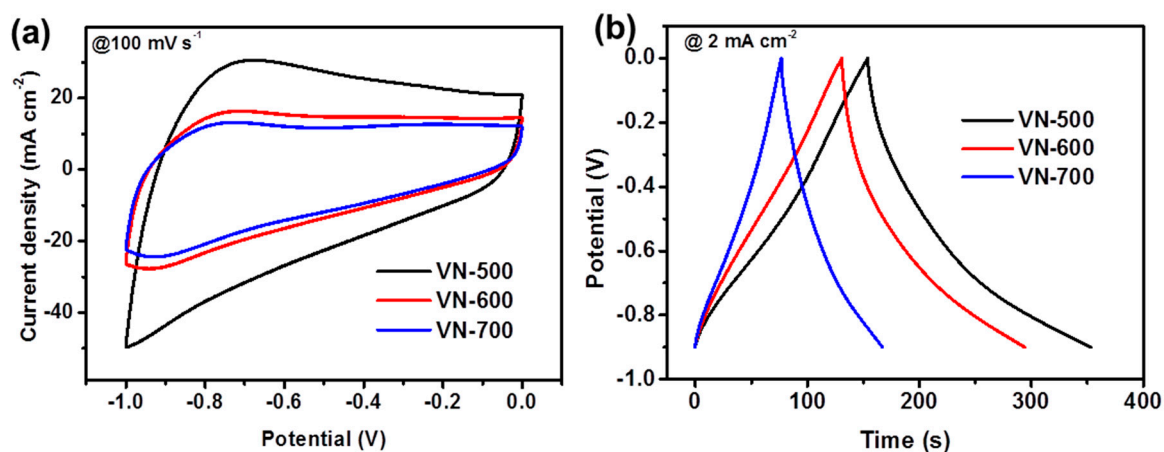

Figure S3. Electrochemical properties of VN-500, VN-600 and VN-700.

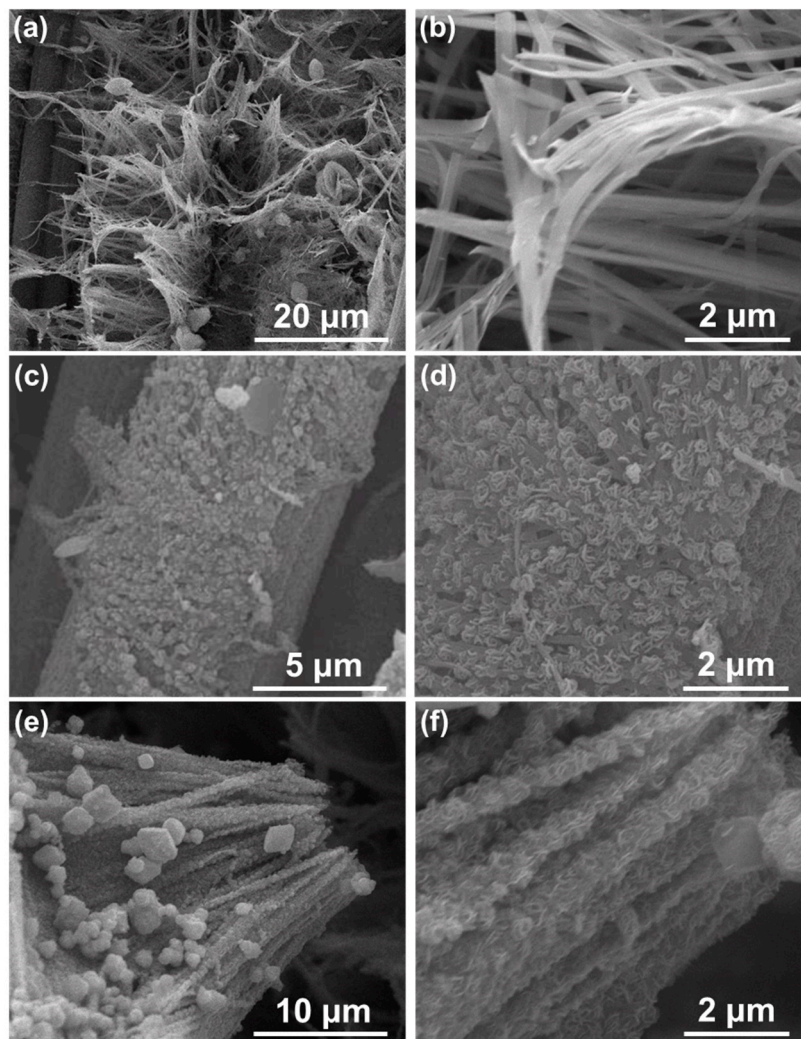

**Figure S4.** SEM images of (a, b) VN500/3hMoS<sub>2</sub>, (c, d) VN500/6hMoS<sub>2</sub> and (e, f) VN500/9hMoS<sub>2</sub>. SEM images of the hybrid samples revealed some differences, with VN500/9hMoS<sub>2</sub> displaying MoS<sub>2</sub> nanosheets coated on the VN-500 nanowires (Figure S4e and S4f), and much more concentrated than those of VN500/3hMoS<sub>2</sub> (Figure S4a and S4b) and VN500/6hMoS<sub>2</sub> (Figure S4c and S4d).

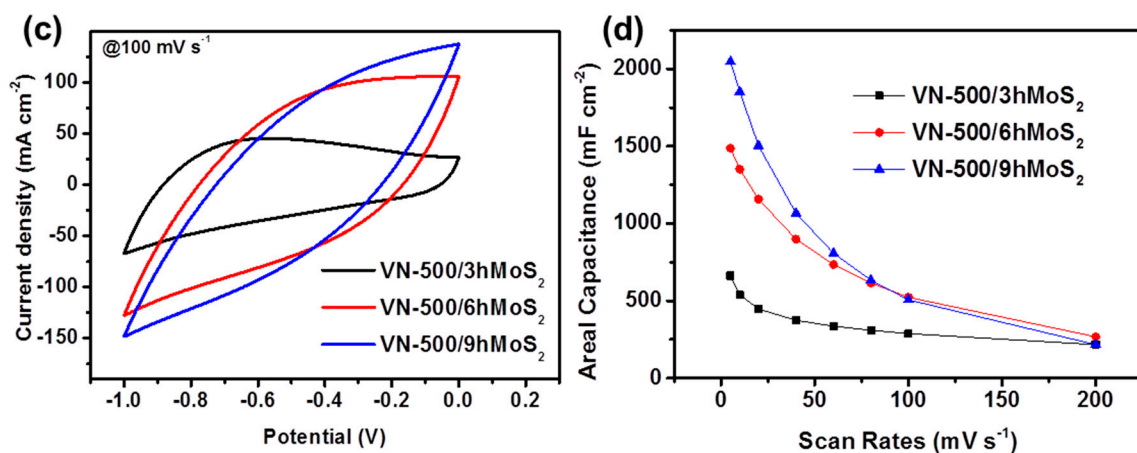

**Figure S5.** Electrochemical properties of VN500/3hMoS<sub>2</sub>, VN500/6hMoS<sub>2</sub> and VN500/9hMoS<sub>2</sub>. Electrochemical properties displayed in Figure S5 also revealed that the performance of both VN500/6hMoS<sub>2</sub> and VN500/9hMoS<sub>2</sub> are very similar (VN500/9hMoS<sub>2</sub> slightly higher at low scan rates but VN500/6hMoS<sub>2</sub> show better performance at higher scan rate implying better rate performance) but significantly better than that of VN500/3hMoS<sub>2</sub>. Hence, we select VN500/6hMoS<sub>2</sub> as the optimized VN/MoS<sub>2</sub> hybrid due to the economic factor of time and electricity consumed during hydrothermal to 9 h.

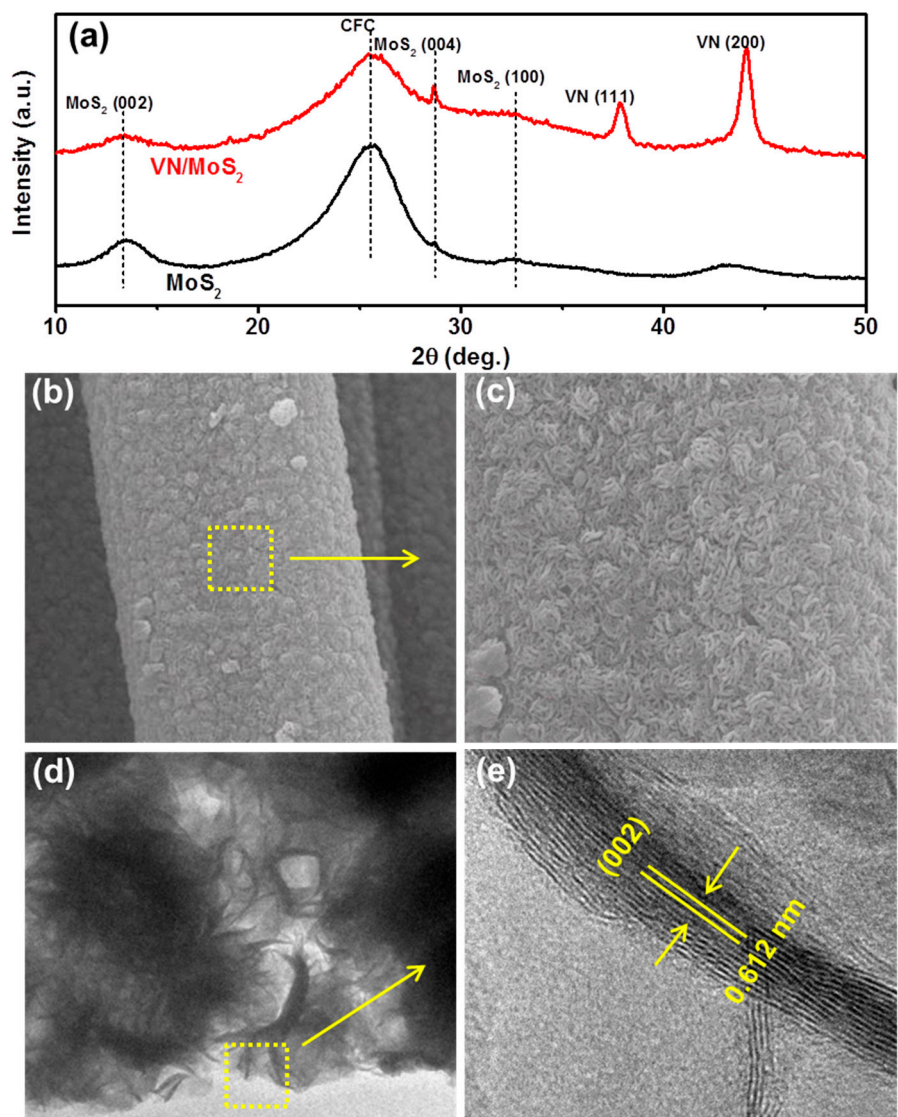

**Figure S6.** (a) XRD spectra, (b, c) SEM images and (d, e) TEM images of  $\text{MoS}_2$ .

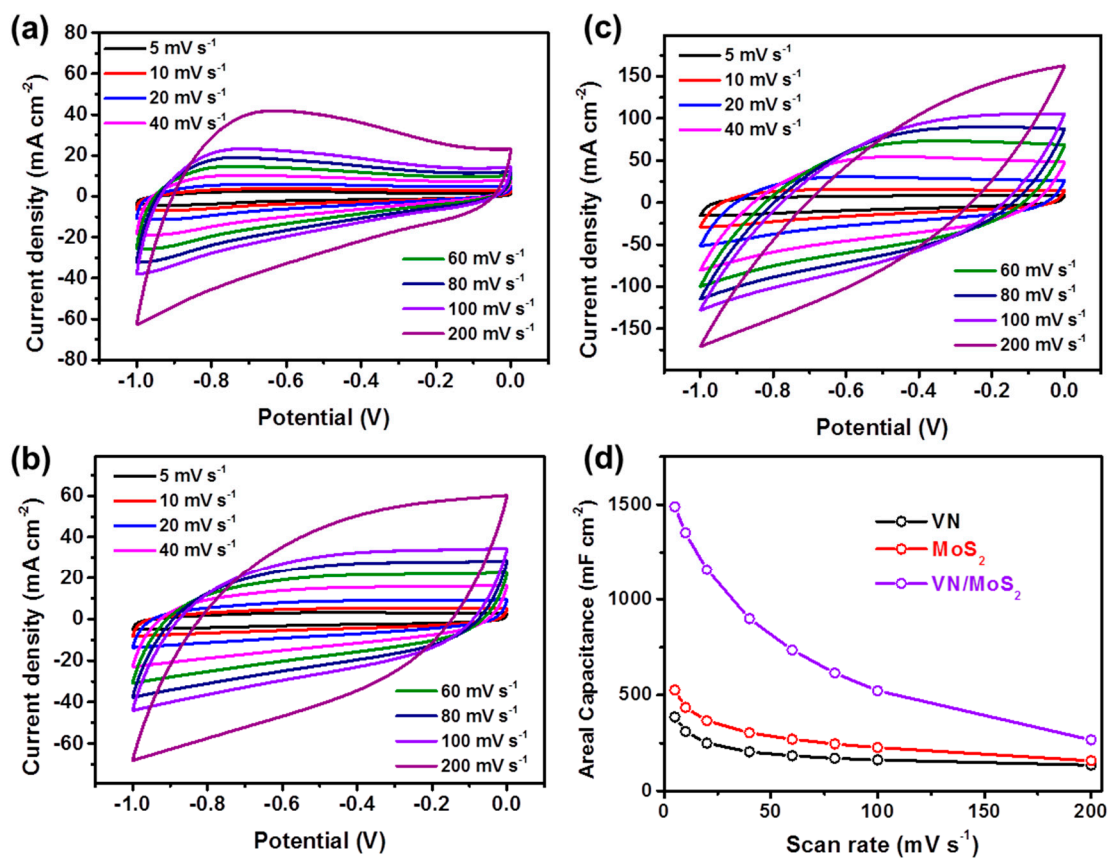

**Figure S7.** CV curves of (a) VN, (b) MoS<sub>2</sub> and (c) VN/MoS<sub>2</sub>. (d) Rate performance of VN and VN/MoS<sub>2</sub> electrodes.

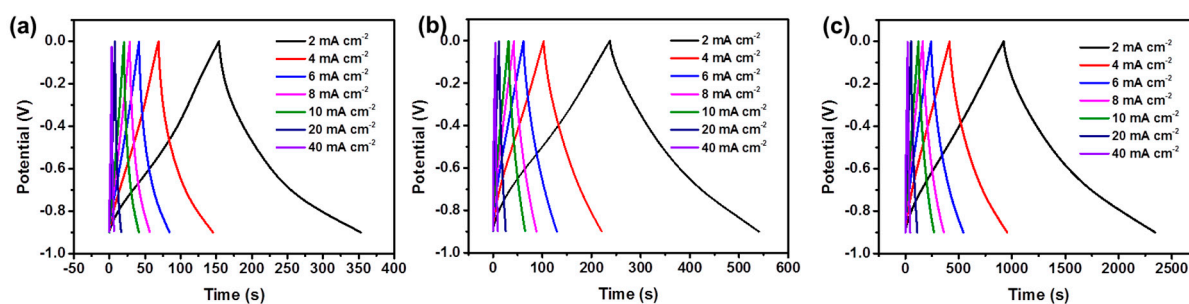

**Figure S8.** Galvanostatic charge/discharge profiles of (a) VN, (b) MoS<sub>2</sub> and (c) VN/MoS<sub>2</sub> electrodes.



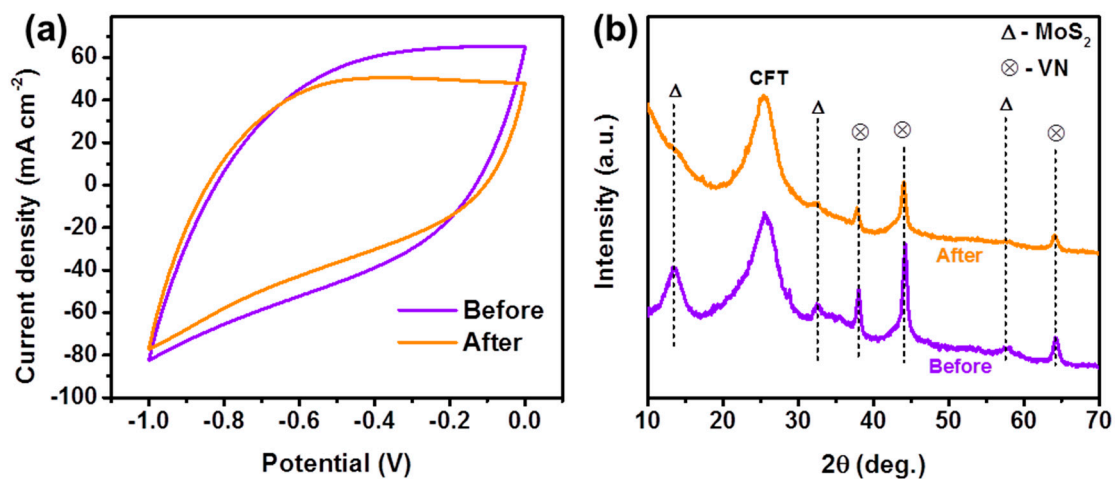

**Figure S9.** (a) CV curves and (b) XRD spectra of VN/MoS<sub>2</sub> electrodes before and after cyclic stability test.

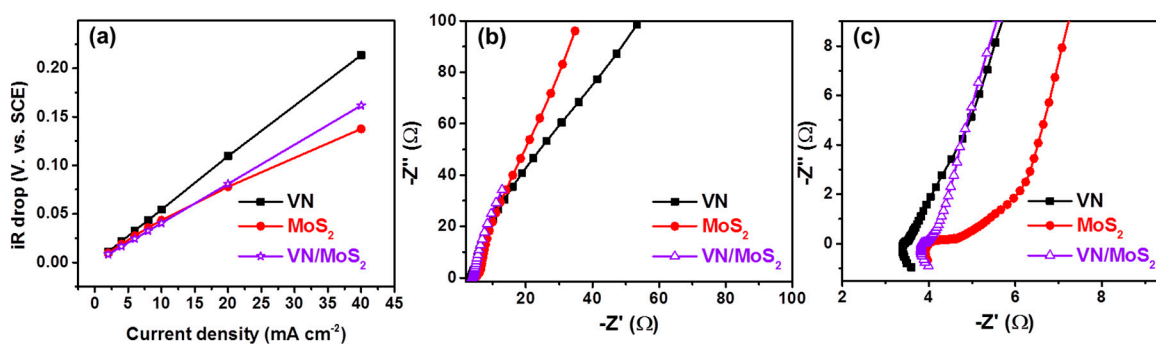

**Figure S10.** (a) *iR* drop, and (b, c) Nyquist plot of VN, MoS<sub>2</sub> and VN/MoS<sub>2</sub> electrodes.

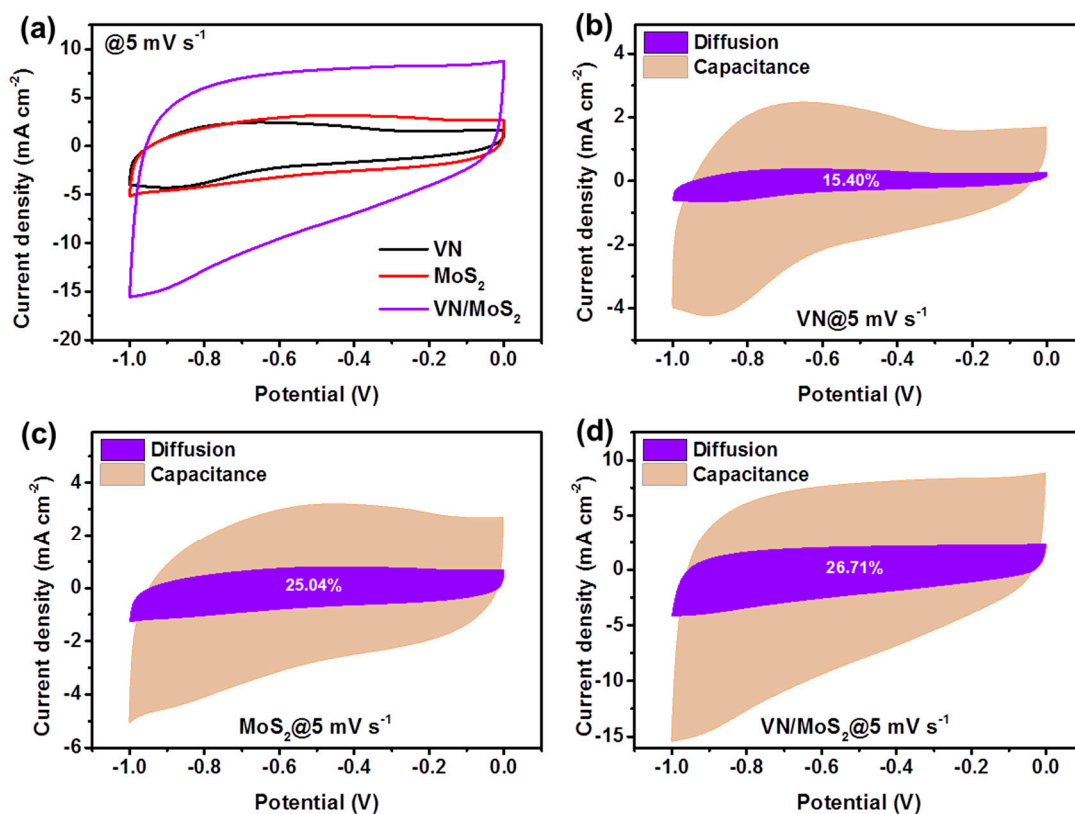

**Figure S11.** Pseudocapacitive Charge Storage Mechanism. (a) CV curves of VN and VN/MoS<sub>2</sub> electrodes at a scan rate of 5 mV s<sup>-1</sup>. CV curves showing the capacitive and diffusion-controlled contributions at 5 mV s<sup>-1</sup> of (b) VN, (c) MoS<sub>2</sub> and (d) VN/MoS<sub>2</sub>.

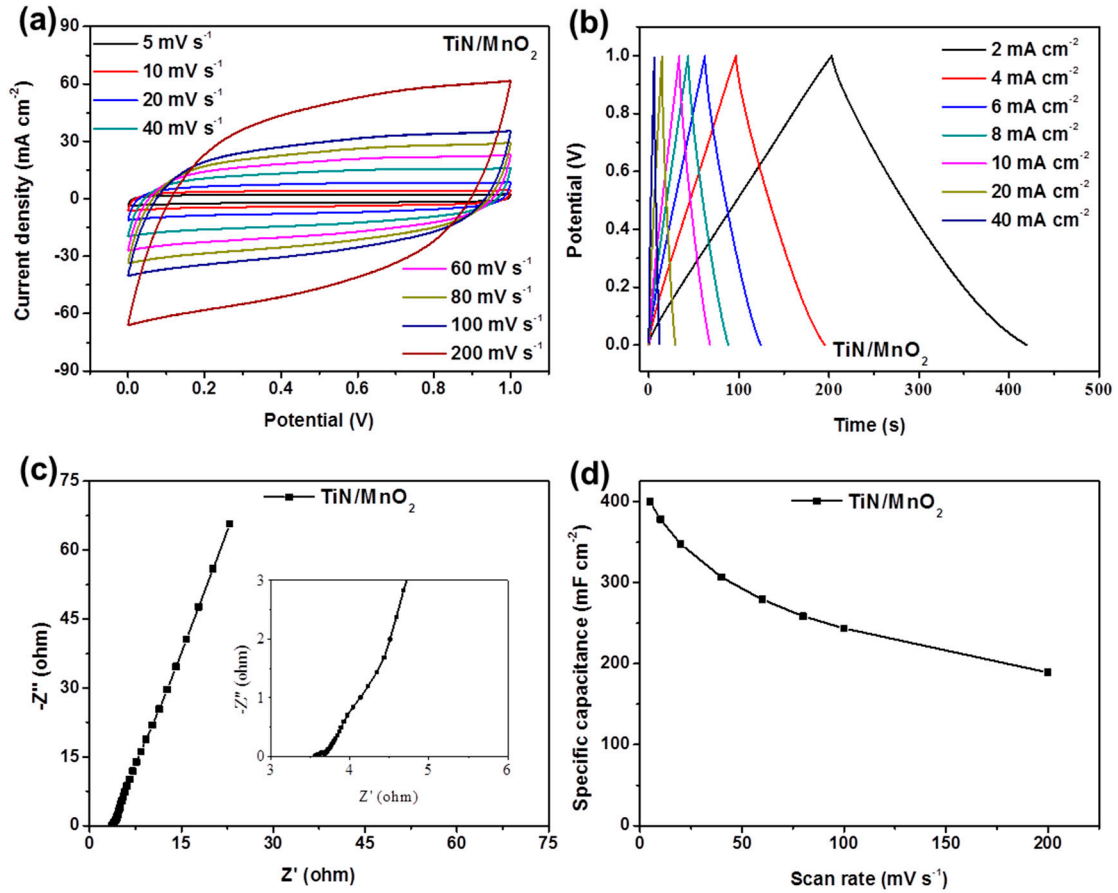

**Figure S12.** Electrochemical properties of TiN/MnO<sub>2</sub>. (a) CV curves at different scan rates, (b) Galvanostatic charge/discharge profiles at a different current densities, (c) Nyquist plot and (d) Rate performance as a function of scan rates.

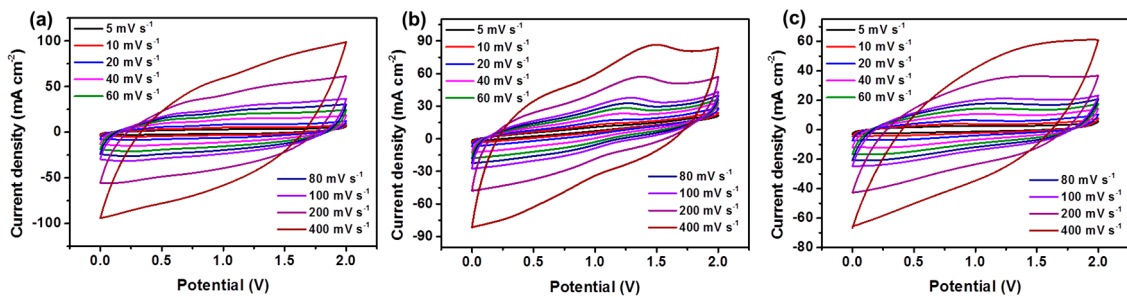

**Figure S13.** CV curves of (a) VN/MoS<sub>2</sub>//TiN/MnO<sub>2</sub>, (b) VN//TiN/MnO<sub>2</sub> and (c) MoS<sub>2</sub>//TiN/MnO<sub>2</sub> at different scan rates.

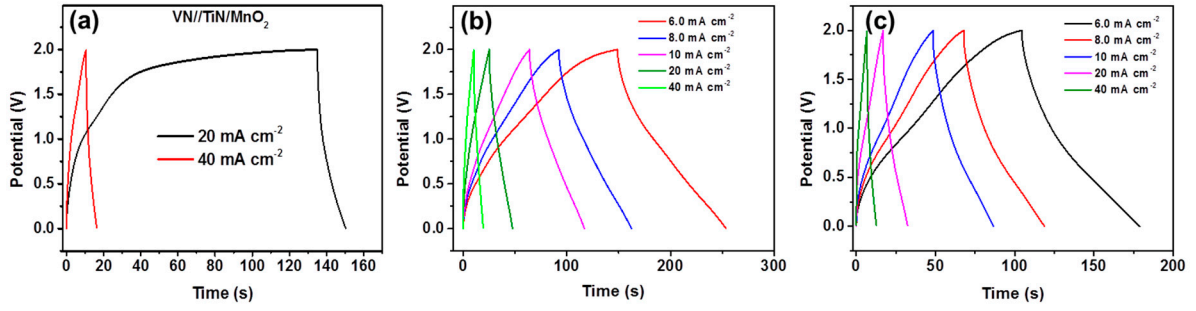

**Figure S14.** Galvanostatic charge–discharge curves of the (a) VN//TiN/MnO<sub>2</sub>, (b) MoS<sub>2</sub>//TiN/MnO<sub>2</sub> and (c) VN/MoS<sub>2</sub>//TiN/MnO<sub>2</sub>-SSAPC devices obtained at different current densities up to voltage window of 2.0 V.

**Table S1.** Comparison of the areal capacitance of VN-based electrodes in different electrolytes.

| Electrodes                         | Electrolyte                    | Areal Capacitance<br>(mF cm <sup>-2</sup> ) | Rate Performance<br>(mF cm <sup>-2</sup> ) |
|------------------------------------|--------------------------------|---------------------------------------------|--------------------------------------------|
| VN/MoS <sub>2</sub><br>(This work) | 5 M LiCl                       | 3187.30<br>@ 2.0 mA cm <sup>-2</sup>        | 1294.30<br>@ 40.0 mA cm <sup>-2</sup>      |
| VN nanowires<br>(This work)        | 5 M LiCl                       | 447.28<br>@ 2.0 mA cm <sup>-2</sup>         | 175.36<br>@ 40.0 mA cm <sup>-2</sup>       |
| Mesoporous<br>VN/CNT [1]           | H <sub>3</sub> PO <sub>4</sub> | 178.0<br>@ 1.1 mA cm <sup>-2</sup>          | ≈ 75<br>@ 11.0 mA cm <sup>-2</sup>         |
| VNQDs/PC<br>hybrid [2]             | 6 M KOH                        | 1124.0<br>@ 4 mA cm <sup>-2</sup>           | 209<br>@ 17.0 mA cm <sup>-2</sup>          |
| MVN@NC<br>NWs film [3]             | 6 M KOH                        | 282.0<br>@ 1.44 mA cm <sup>-2</sup>         | 200<br>@ 30.0 mA cm <sup>-2</sup>          |
| VN/CNTF [4]                        | 6 M KOH                        | 564.0<br>@ 1.0 mA cm <sup>-2</sup>          | 361<br>@ 10.0 mA cm <sup>-2</sup>          |
| VN thin films [3]                  | 6 M KOH                        | 238.2<br>@ 5 mV s <sup>-1</sup>             | 24.7<br>@ 100 mV s <sup>-1</sup>           |

**Table S2.** Comparison of the VN-based and other related PVA-based solid-state supercapacitor devices.

| Devices                                                                                | Electrolyte                         | Maximum Energy Density (mWh cm <sup>-3</sup> )           | Maximum Power Density (W cm <sup>-3</sup> )         |
|----------------------------------------------------------------------------------------|-------------------------------------|----------------------------------------------------------|-----------------------------------------------------|
| VN/MoS <sub>2</sub> //TiN/MnO <sub>2</sub><br>This work                                | LiCl/PVA                            | 2.24<br>@ 6.0 mA cm <sup>-2</sup>                        | 0.60<br>@ 40.0 mA cm <sup>-2</sup>                  |
| VN//TiN/MnO <sub>2</sub><br>This work                                                  | LiCl/PVA                            | 0.240<br>@ 6.0 mA cm <sup>-2</sup>                       | 0.92<br>@ 40.0 mA cm <sup>-2</sup>                  |
| MVNN/CNT//MVNN/CNT [1]                                                                 | H <sub>3</sub> PO <sub>4</sub> /PVA | 0.54<br>@ 0.025 mA cm <sup>-3</sup>                      | 0.43<br>@ 0.5 mA cm <sup>-3</sup>                   |
| VN//VO <sub>x</sub> [5]                                                                | LiCl/PVA                            | 0.61 mWh cm <sup>-3</sup>                                | 0.85 W cm <sup>-3</sup>                             |
| VN//VN Nanofiber [6]                                                                   | LiCl/PVA                            | 0.89 m Wh cm <sup>-3</sup>                               | 0.016 m W cm <sup>-3</sup>                          |
| MVN@NC//MVN@NC NWs[7]                                                                  | PVA/PAAS/KOH                        | 0.97<br>@ 0.051 mA cm <sup>-3</sup>                      | 2.72<br>@ 0.408 mA cm <sup>-3</sup>                 |
| VN/V <sub>2</sub> O <sub>3</sub> /C//VN/V <sub>2</sub> O <sub>3</sub> /C [8]           | Na <sub>2</sub> SO <sub>4</sub>     | 0.092 cm Wh m <sup>-2</sup> @<br>0.5 mA cm <sup>-2</sup> | 0.45 W cm <sup>-2</sup><br>@ 10 mA cm <sup>-2</sup> |
| MoN@P-CF//RuO <sub>2</sub> @CF [9]                                                     | H <sub>2</sub> SO <sub>4</sub> /PVA | 2.36 @ 4.0 mA cm <sup>-2</sup>                           | 0.17<br>@ 16.0 mA cm <sup>-2</sup>                  |
| Fe <sub>2</sub> N@GNS//TiN@GNS[10]                                                     | LiCl/PVA                            | 0.61<br>@ 2.0 A g <sup>-1</sup>                          | 0.42<br>@ 16.0 A g <sup>-1</sup>                    |
| W <sub>2</sub> N@P-CF//PPy@CF[11]                                                      | H <sub>2</sub> SO <sub>4</sub>      | 2.54<br>@ 4.0 mA cm <sup>-2</sup>                        | 0.232<br>@ 20.0 mA cm <sup>-2</sup>                 |
| TiN//TiN@MnO <sub>2</sub> [12]                                                         | LiCl/PVA                            | 0.55<br>@ 1.0 mA cm <sup>-2</sup>                        | 1.53<br>@ 8.0 mA cm <sup>-2</sup>                   |
| H-MnO <sub>2</sub> //RGO [13]                                                          | LiCl/PVA                            | 0.25<br>@ 2.0 mA cm <sup>-2</sup>                        | 1.43<br>@ 12.0 mA cm <sup>-2</sup>                  |
| 3DHPC-NiCo <sub>2</sub> S <sub>4</sub> //3DHPC-<br>Fe <sub>2</sub> O <sub>3</sub> [14] | PVA                                 | 1.71<br>@ 2.0 A g <sup>-1</sup>                          | 0.06<br>@ 10.0 A g <sup>-1</sup>                    |

## References

1. Xiao, X.; Peng, X.; Jin, H.; Li, T.; Zhang, C.; Gao, B.; Hu, B.; Huo, K.; Zhou, J. Freestanding mesoporous VN/CNT hybrid electrodes for flexible all-solid-state supercapacitors. *Adv. Mater.* **2013**, *25*, 5091-5097.
2. Yang, Y.; Zhao, L.; Shen, K.; Liu, Y.; Zhao, X.; Wu, Y.; Wang, Y.; Ran, F. Ultra-small vanadium nitride quantum dots embedded in porous carbon as high performance electrode materials for capacitive energy storage. *J. Power Sources* **2016**, *333*, 61-71.
3. Achour, A.; Lucio-Porto, R.; Solaymani, S.; Islam, M.; Ahmad, I.; Brousse, T. Reactive sputtering of vanadium nitride thin films as pseudo-capacitor electrodes for high areal capacitance and cyclic stability. *J. Mater. Sci.: Mater. Electron.* **2018**, *29*, 13125-13131.
4. Guo, J.; Zhang, Q.; Sun, J.; Li, C.; Zhao, J.; Zhou, Z.; He, B.; Wang, X.; Man, P.; Li, Q., *et al.* Direct growth of vanadium nitride nanosheets on carbon nanotube fibers as novel negative electrodes for high-energy-density wearable fiber-shaped asymmetric supercapacitors. *J. Power Sources* **2018**, *382*, 122-127.
5. Lu, X.; Yu, M.; Zhai, T.; Wang, G.; Xie, S.; Liu, T.; Liang, C.; Tong, Y.; Li, Y. High energy density asymmetric quasi-solid-state supercapacitor based on porous vanadium nitride nanowire anode. *Nano Lett.* **2013**, *13*, 2628-2633.
6. Zhang, D.; Li, J.; Su, Z.; Hu, S.; Li, H.; Yan, Y. Electrospun polyporous VN nanofibers for symmetric all-solid-state supercapacitors. *J. Adv. Ceram.* **2018**, *7*, 246-255.

7. Gao, B.; Li, X.; Guo, X.; Zhang, X.; Peng, X.; Wang, L.; Fu, J.; Chu, P.K.; Huo, K. Nitrogen-doped carbon encapsulated mesoporous vanadium nitride nanowires as self-supported electrodes for flexible all-solid-state supercapacitors. *Adv. Mater. Interfaces* **2015**, *2*, 1500211.
8. Zhang, Y.; Wang, X.; Zheng, J.; Hu, T.; Liu, X.; Meng, C. Facile synthesis of high-surface vanadium nitride/vanadium sesquioxide/amorphous carbon composite with porous structures as electrode materials for high performance symmetric supercapacitors. *Appl. Surf. Sci.* **2019**, *471*, 842-851.
9. Dubal, D.P.; Abdel-Azeim, S.; Chodankar, N.R.; Han, Y.-K. Molybdenum nitride nanocrystals anchored on phosphorus-incorporated carbon fabric as a negative electrode for high-performance asymmetric pseudocapacitor. *iScience* **2019**, *16*, 50-62.
10. Zhu, C.; Yang, P.; Chao, D.; Wang, X.; Zhang, X.; Chen, S.; Tay, B.K.; Huang, H.; Zhang, H.; Mai, W., *et al.* All metal nitrides solid-state asymmetric supercapacitors. *Adv. Mater.* **2015**, *27*, 4566-4571.
11. Dubal, D.P.; Chodankar, N.R.; Qiao, S. Tungsten nitride nanodots embedded phosphorous modified carbon fabric as flexible and robust electrode for asymmetric pseudocapacitor. *Small* **2019**, *15*, 1804104.
12. Liu, Y.; Xiao, R.; Qiu, Y.; Fang, Y.; Zhang, P. Flexible advanced asymmetric supercapacitors based on titanium nitride-based nanowire electrodes. *Electrochim. Acta* **2016**, *213*, 393-399.
13. Zhai, T.; Xie, S.; Yu, M.; Fang, P.; Liang, C.; Lu, X.; Tong, Y. Oxygen vacancies



enhancing capacitive properties of MnO<sub>2</sub> nanorods for wearable asymmetric supercapacitors. *Nano Energy* **2014**, *8*, 255-263.

14. Fan, H.; Liu, W.; Shen, W. Honeycomb-like composite structure for advanced solid state asymmetric supercapacitors. *Chem. Eng. J.* **2017**, *326*, 518-527.
